# Supplementary material for: Predicting and Testing Bioavailability of Magnesium Supplements
Source: PubMed Central journal article supplement (PMC6683096; doi:10.3390/nu11071663), 2019-07-20
Supplement: nutrients-11-01663-s001.pdf [file nutrients-11-01663-s001.pdf]

**Table S1.** qualitative composition of the 15 magnesium formulations used in this study.

| <b>Product</b>              | <b>Qualitative Composition</b>                                                                                                                                                                                                                        |
|-----------------------------|-------------------------------------------------------------------------------------------------------------------------------------------------------------------------------------------------------------------------------------------------------|
| Ultractive Magnesium        | Magnesium glycerophosphate, magnesium oxide, hydroxypropyl methylcellulose, microcrystalline cellulose, polyvinylpyrrolidone, citric acid, sodium hydrogencarbonate, magnesium stearate, pyridoxine hydrochloride                                     |
| MagnéVie B6                 | Anhydrous magnesium citrate, pyridoxine hydrochloride, lactose anhydrous, macrogol 6000, magnesium stearate, hypromellose, titanium dioxide (E171), talc                                                                                              |
| Promagnor                   | Magnesium oxide, microcrystalline cellulose, hydroxypropyl methylcellulose magnesium stearate, titanium dioxide                                                                                                                                       |
| Mag2                        | Magnesium carbonate, pregelatinised corn starch, potato starch, magnesium stearate, talc                                                                                                                                                              |
| Magnesium Verla N tablets * | Calcium carbonate, dimeticon (350 cSt), glucose syrup, glycerol, potassium, macrogol 35000, macrogol 6000, methyl acrylic acid-ethyl acrylic copolymer D, montan wax, povidone K25, sucrose, talc, titanium dioxide, triethylcitrate, vanillin        |
| Magnerot                    | Magnesium orotate dihydrate, lactose monohydrate                                                                                                                                                                                                      |
| Mag2 24h                    | Magnesium oxide, cellulose, calcium phosphate, hydroxypropyl methylcellulose, calcium phosphate, mono and diglycerides of fatty acids, cocoa bean extract, magnesium salts of fatty acids, silicon dioxide, Vitamin B6, sodium carboxymethylcellulose |
| Polase                      | Microcrystalline cellulose, potassium citrate, magnesium citrate, croscarmellose sodium, glycerol behenate, polyvinylpyrrolidone, magnesium stearate, silicon dioxide                                                                                 |
| Biolectra                   | Magnesium oxide, gelatine, starch pregelatinised, polyethylene glycol, titanium dioxide                                                                                                                                                               |
| High Absorption Magnesium   | Magnesium glycinate lysinate chelate, microcrystalline cellulose, croscarmellose sodium, magnesium stearate, stearic acid, hypromellose, silicon dioxide, starch, glycerin, hydroxypropyl cellulose                                                   |
| MagOx 400                   | Magnesium oxide, microcrystalline cellulose, hydroxypropyl cellulose, crospovidone, hypromellose, maltodextrin, magnesium stearate, silicon dioxide, PEG                                                                                              |
| Magnesium 500mg             | Magnesium oxide, cellulose, dicalcium phosphate, citric acid, titanium dioxide, magnesium stearate                                                                                                                                                    |
| Magnesium Citrate 200mg     | Magnesium citrate, hydroxypropyl cellulose, microcrystalline cellulose, vegetarian coating, croscarmellose sodium, stearic acid, magnesium stearate                                                                                                   |
| Slow Mag                    | Magnesium chloride hexahydrate, calcium carbonate, cellulose acetate phthalate, pregelatinized starch, povidone, diethyl phthalate, talc, titanium dioxide, magnesium stearate, carnauba wax                                                          |
| B-Magnum                    | Magnesium oxide, starch, cellulose, calcium phosphate, hydrogenated cotton oil, talc, shellac, hydroxypropyl methylcellulose, titanium dioxide                                                                                                        |
